# Supplementary material
Source: Research Square preprint supplement (doi:10.21203/rs.3.rs-8911082/v1)
Supplement: Supplementary file 1 [file 8b61296bf669d42ef7cc5d62.docx]

**Supplementary Material**

**Spatiotemporal arising of molecular and functional Blood-Brain Barrier properties in the developing *Gallus gallus* optic tectum**

**Jesús Juárez-Balarezo1,+, María Jesús Garrido-Muñoz1,+, Benjamín Reuse1, Ignacio Casanova-Maldonado1, Verónica Palma1c.**


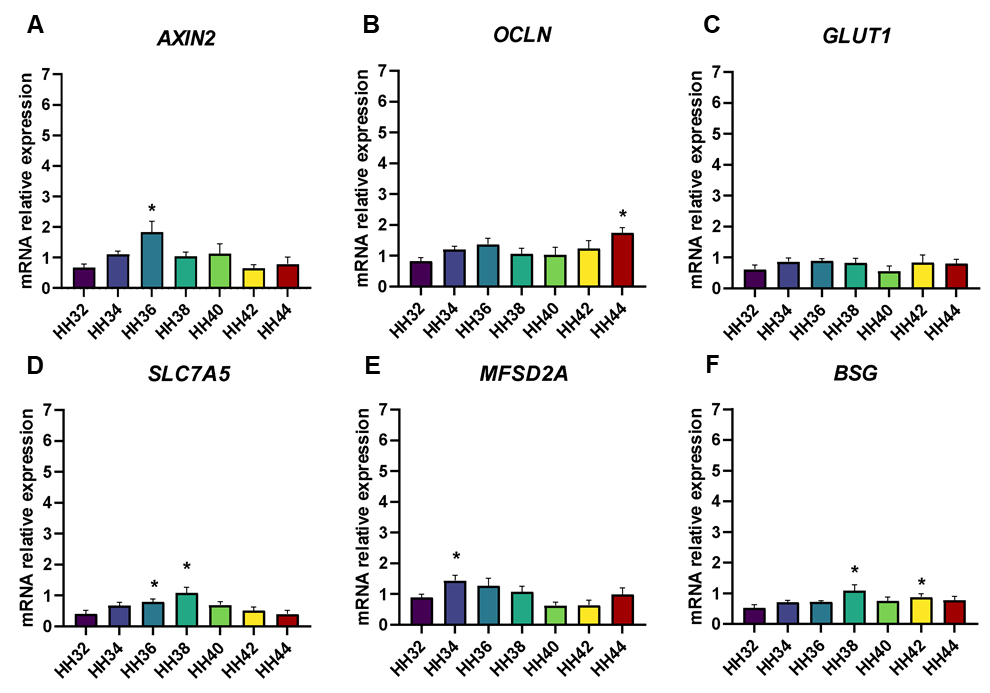
**Supplementary Figure 1. Transcriptional dynamics of additional BBB-associated genes in the developing *Gallus gallus* OT.** Relative mRNA expression of **(A)** *AXIN2*, **(B)** *OCLN*, **(C)** *GLUT1*, **(D)** *SLC7A5,* **(E)** *MFSD2A* and **(F)** *BSG* in *Gallus gallus* embryo OT at development stages as indicated. Expression levels were normalized to the reference genes *ATCB* and *AARS1* and calculated relative to HH38. Data are presented as mean ± SEM (n = 5, each in duplicate). ns, not significant; *p < 0.05 (One way ANOVA against HH32).

**Supplementary Figure 2.** **Multiple comparison analysis of BBB- related genes across experimental development stages**. Data are presented as p-value according to One way ANOVA analysis followed by Fisher’s LSD test. Comparisons with p-value < 0.05 are highlig1ed in bold.
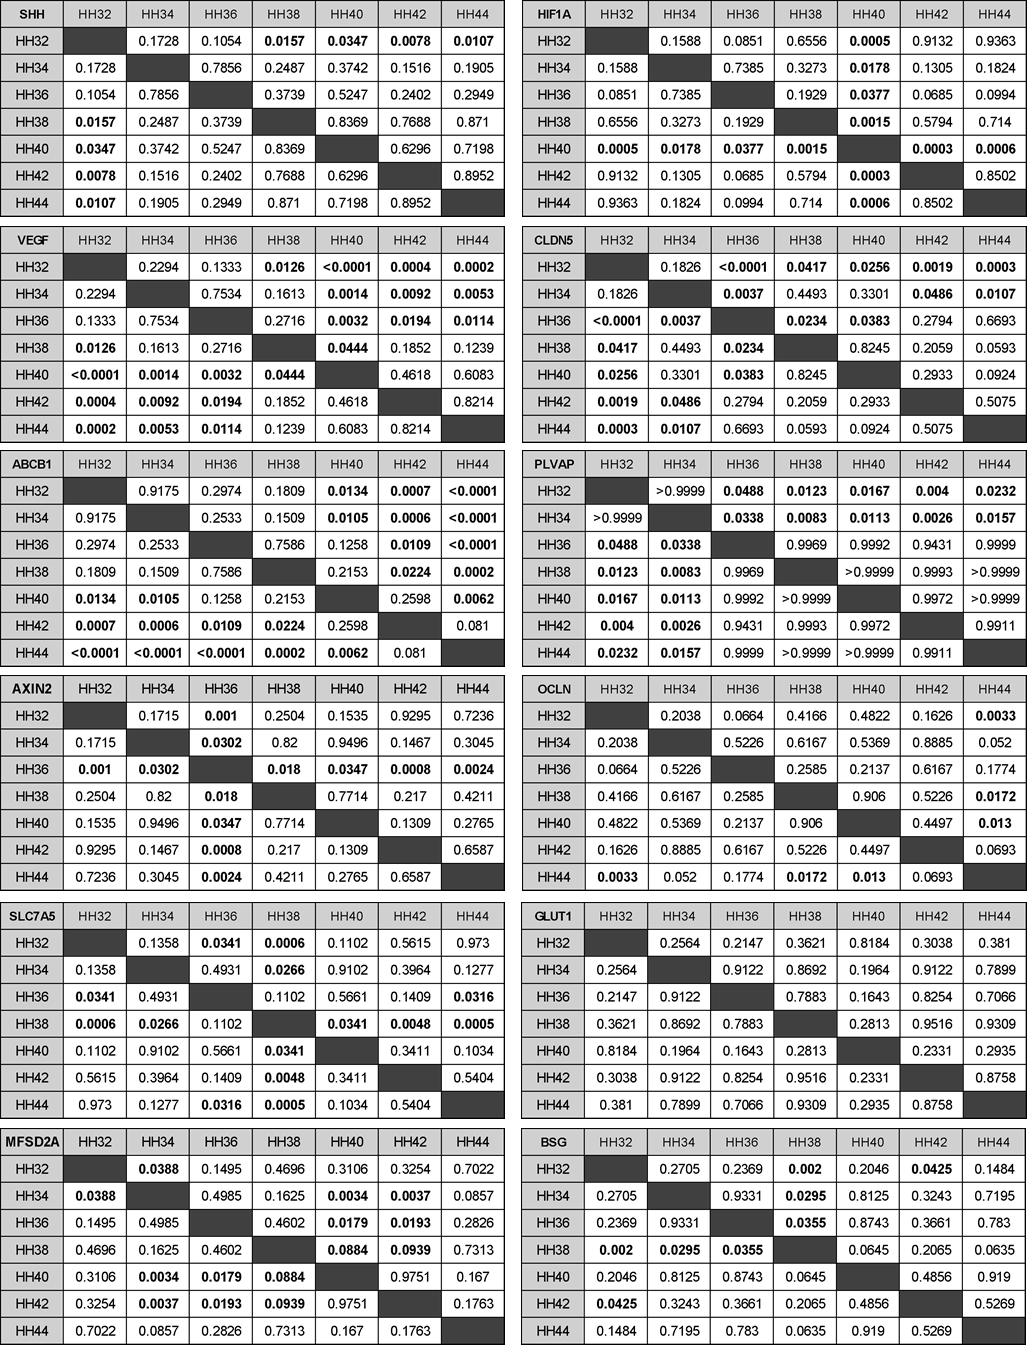


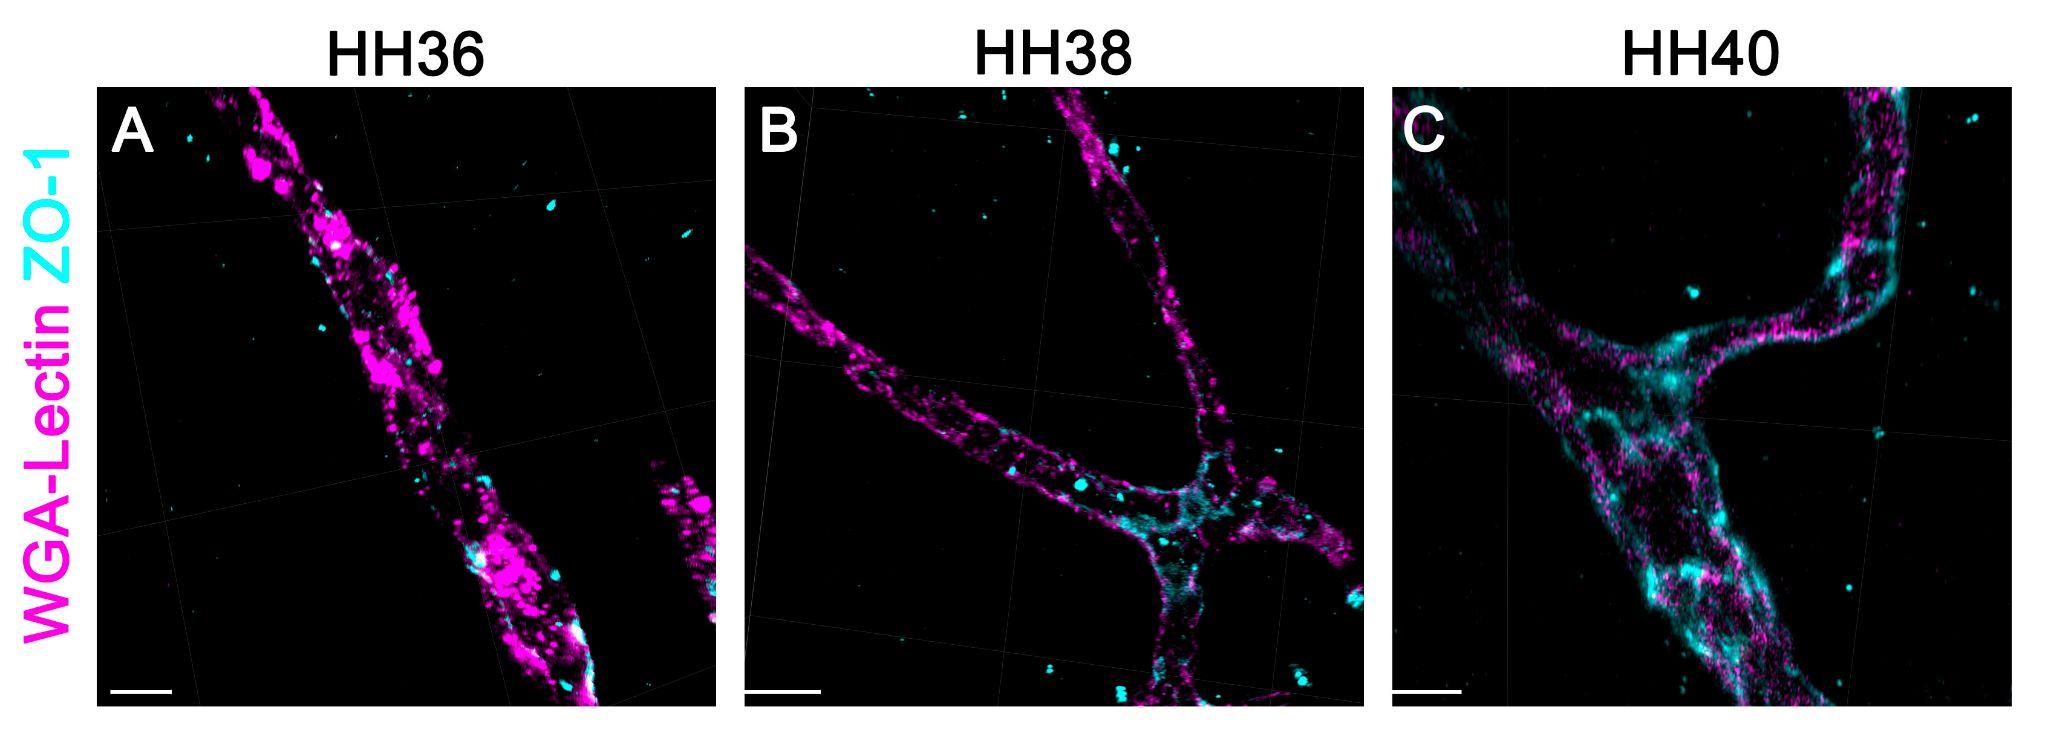


**Supplementary Figure 3. Tridimensional reconstruction of ZO-1 distribution across developing OT.** Representative 3D images of OT sections labeled for blood vessels (magenta) and ZO-1 (cyan) at HH36 (A), HH38 (B) and HH40 (C) developmental stages. Scale bar = 200 µm.

**Supplementary Figure 4. Claudin-5 immunoreactivity in developing OT blood vessels.** Representative images showing tissue parenchyma (nuclear staining – gray), blood vessels (magenta) and CLDN5 (cyan) at HH36 (A-B’), HH38 (C-D’) and HH40 (E-F’) developmental stages; Scale bar = 200 µm. Magnifications correspond to area delimited in white doted squares; Scale bar = 50 µm. Arrowheads indicate blood vessels regions positive for CLDN5 signal.
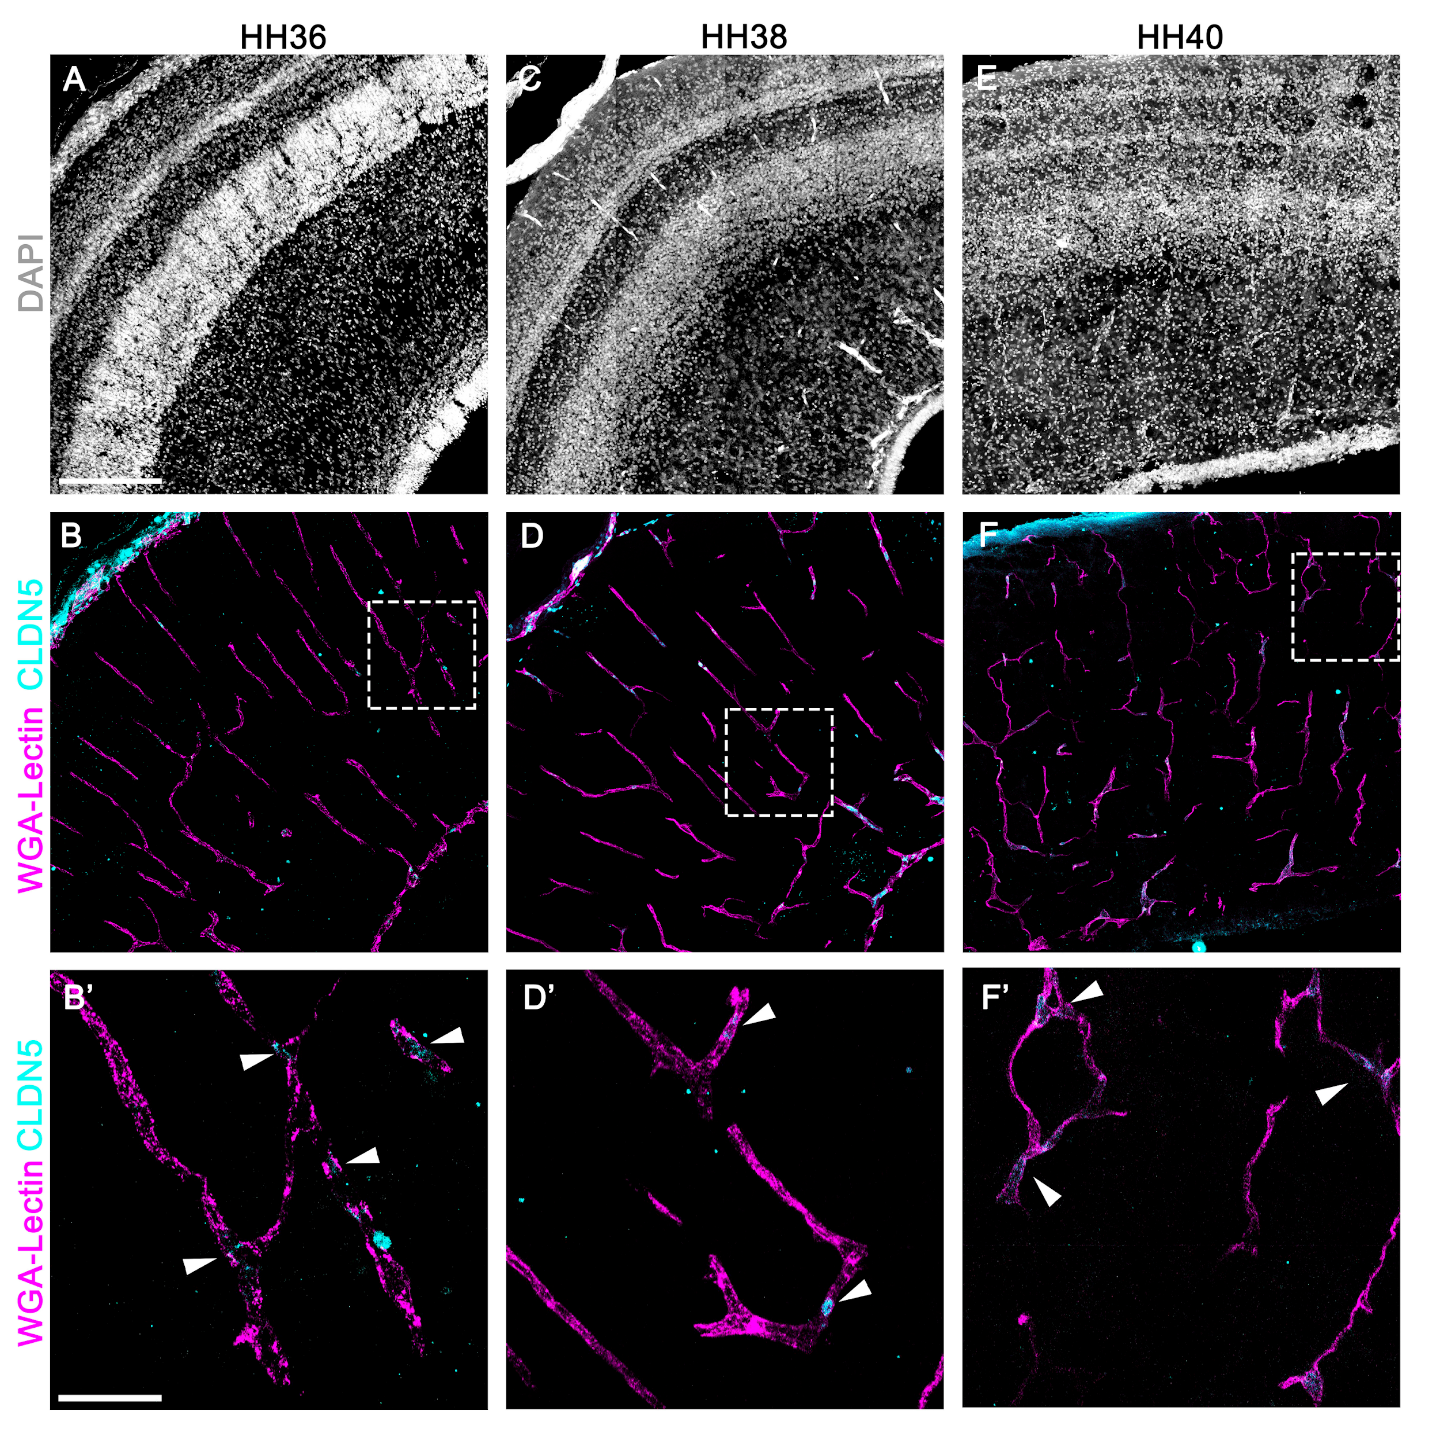


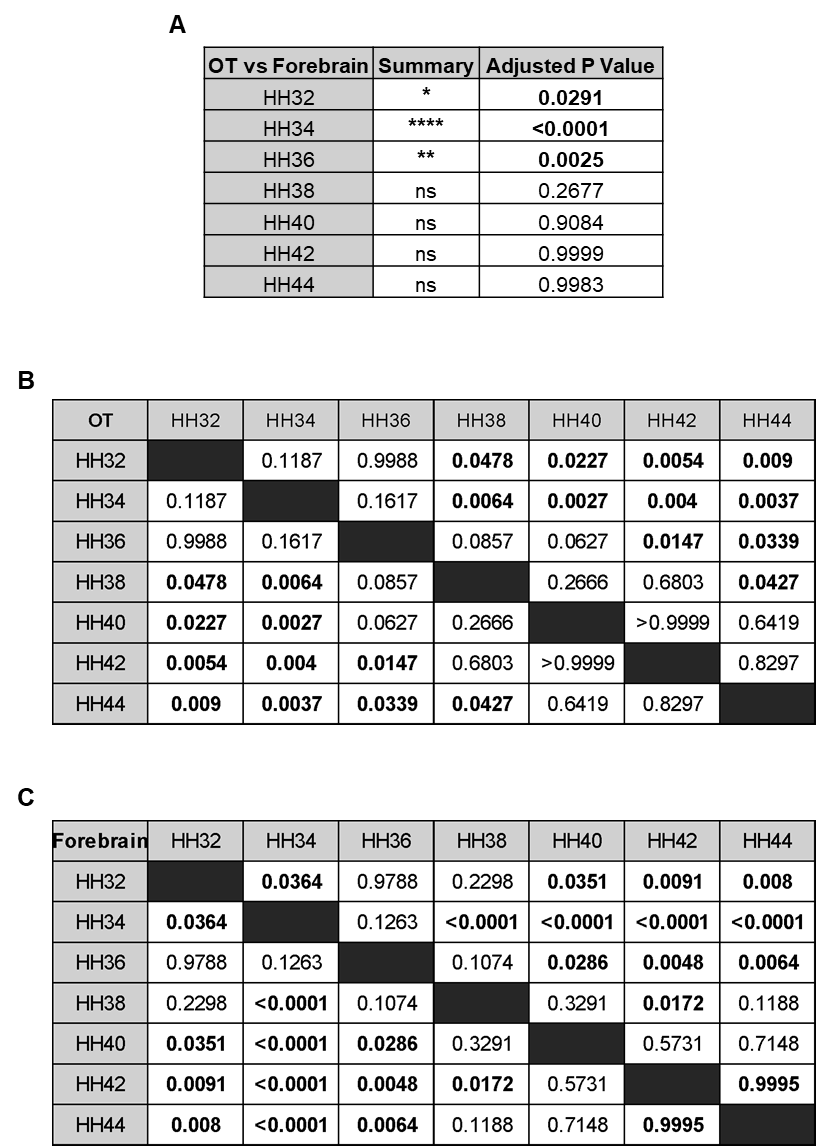


**Supplementary Figure 5.** **Multiple comparison analysis for EB permeability assay**. Data presented as p-value according to Two- way RM ANOVA analysis. Comparisons with p-value < 0.05 in bold text. **(A)** Comparison between OT and Forebrain for the same developmental stages. **(B)** and **(C)** show comparisons in EB concentration between OT and forebrain for every development stage, separately.


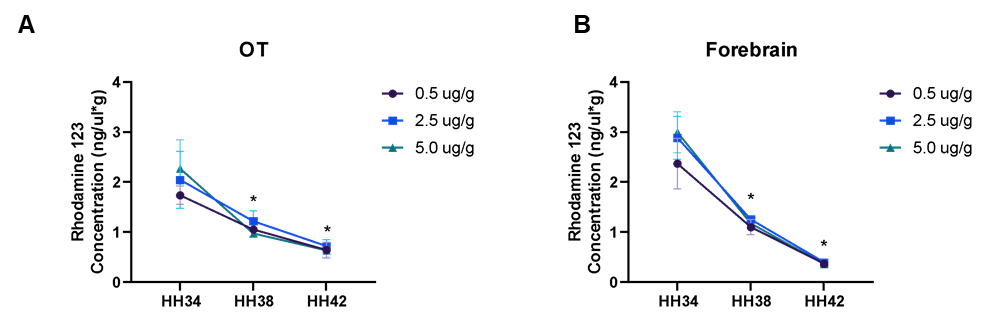


**Supplementary Figure 6. Validation of the Rhodamine-123 (R123) assay for assessing P-glycoprotein (P-gp) function.** Quantification of R123 tissue concentration (ng/µL*g) in the **(A)** OT and **(B)** Forebrain. Across three different injected concentrations, a progressive decrease in R123 accumulation is observed from HH34 to HH42, indicating a developmental increase in functional P-gp efflux activity. Data are presented as mean ± SD (n = 5). Statistical significance was determined using a Two-way RM ANOVA (*p < 0.05)


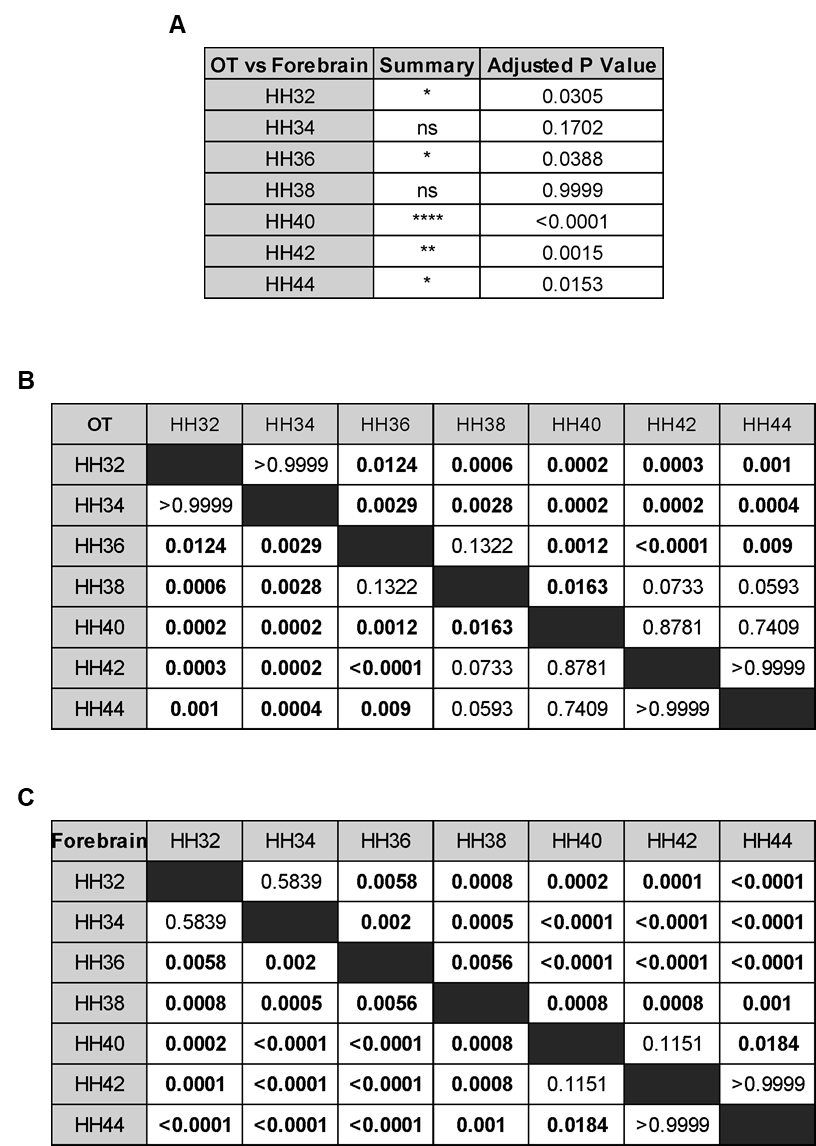


**Supplementary Figure 7.** Multiple comparison analysis for R123 efflux assay. Data is presented as p-value according to Two way RM ANOVA. Comparisons with p-value < 0.05 in bold text. (A) Comparison between OT and Forebrain for the same stages. (B) and (C) show comparisons in R123 concentration between OT and Forebrain for every development stage, separately.

**Supplementary Table 1: Primer sequences used for qPCR analysis.** List of forward (Fw Sequence) and reverse primers (Rv Sequence) for reference genes and target genes involved in signaling (*SHH, HIF1A, VEGF, AXIN2*), tight junctions (*CLDN5, OCLN*), and transport (*ABCB1, PLVAP, GLUT1, SLC7A5, MFSD2A, BSG*). All sequences are derived from the *Gallus gallus* genome.

| **Gene** | **Species** | **Fw Sequence 5’-3** | **Rv Sequence 5’-3’** |
| --- | --- | --- | --- |
| *AARS1* | *Gallus gallus* | TCAATCGATGAGACCAGGCG | TGATTTCCTGCGTGGACAGG |
| *ACTB* | *Gallus gallus* | ACCGCAAATGCTTCTAAACCG | TGAGTCAAGCGCCAAAAGAA |
| *SHH* | *Gallus gallus* | CCATCACTCCGAGGAATCGC | CTCCTGATTTCGCTGCCACT |
| *HIF1A* | *Gallus gallus* | TGGGACTCACTCAGTTCGAT | GCTGGTCAGCGTACACTTCA |
| *VEGF* | *Gallus gallus* | CAAGAAAGGCCGGTACAAACCA | TCGACTTGCAACGTGAGTCTGT |
| *AXIN2* | *Gallus gallus* | ACGTTGGAGAACGGGTACAG | GGGGGATCCCATCTACACTG |
| *CLDN5* | *Gallus gallus* | ATGCAGTGCAAGGTGTACGA | GATCACGATGCGGGACTTCA |
| *OCLN* | *Gallus gallus* | GGCCTTCGTCATGCTCATCG | GTCCACGGTGCAGTAGTGGT |
| *ABCB1* | *Gallus gallus* | GCCTCACAAGTAAAAGGAGCAA | CTGCCACTGCAATGATTGGT |
| *PLVAP* | *Gallus gallus* | CCGGAATGCCAACCTGACAC | CCTTCTGATGTCCTCTAGCCTG |
| *GLUT1* | *Gallus gallus* | GAGCGGCAGCAAGATGACAG | TGGGCTCCTCATATCGGTACA |
| *SLC7A5* | *Gallus gallus* | AGATTGCAACGGGTGATGTG | GATGATAGCCAGAGGCAGGTT |
| *MFSD2A* | *Gallus gallus* | CTACGCTCAGCCTGGACTTC | TTCTTGTTCTCCCTGCGCTT |
| *BSG* | *Gallus gallus* | GATGCTACAGGTCCGGTGAT | ACCTTCCCCTCGATCGTGTA |
